# Supplementary material
Source: MDPI journal article supplement (https://www.mdpi.com/1424-2818/14/11/999)
Supplement: s1 [file s1]

## Supplementary material

Article title: **High-resolution mapping of seagrass biomass dynamics suggests differential response of seagrasses to fluctuating environments**

Author names: **Kuan-Yu Chen and Hsing-Juh Lin**

Corresponding author: **Hsing-Juh Lin**

Department of Life Sciences and Innovation and Development Center of Sustainable Agriculture, National Chung Hsing University, Taichung 40227, Taiwan

[hjlin@dragon.nchu.edu.tw](mailto:hjlin@dragon.nchu.edu.tw)

Table S1 Two-way ANOVA results of season (wet vs. dry) and site (Dakwan vs. Nanwan) on environmental parameters collected in southern Taiwan.

| Variable                     | Factor        | MS      | <i>F</i> value | <i>p</i> value | Holm–Sidak test | Transformation |
|------------------------------|---------------|---------|----------------|----------------|-----------------|----------------|
| Water temperature            | Season        | 109.451 | 12.125         | <b>0.004</b>   | Wet > Dry       | Square root    |
|                              | Site          | 0.020   | 0.002          | 0.963          |                 |                |
|                              | Season × Site | 0.191   | 0.021          | 0.886          |                 |                |
| Light extinction coefficient | Season        | 0.104   | 0.248          | 0.627          |                 |                |
|                              | Site          | 1.030   | 2.464          | 0.141          |                 |                |
|                              | Season × Site | 0.689   | 1.648          | 0.222          |                 |                |
| DIN                          | Season        | 5.455   | 6.628          | <b>0.022</b>   | Wet > Dry       |                |
|                              | Site          | 0.108   | 0.131          | 0.723          |                 |                |
|                              | Season × Site | 0.039   | 0.047          | 0.832          |                 |                |
| DIP                          | Season        | 0.011   | 0.966          | 0.342          |                 |                |
|                              | Site          | 0.003   | 0.282          | 0.604          |                 |                |
|                              | Season × Site | 0.001   | 0.072          | 0.792          |                 |                |
| Sediment depth               | Season        | 0.093   | 0.007          | 0.935          |                 |                |
|                              | Site          | 198.025 | 14.611         | <b>0.002</b>   |                 |                |
|                              | Season × Site | 14.003  | 1.033          | 0.327          |                 |                |
| Grain size                   | Season        | 0.003   | 0.056          | 0.817          |                 |                |
|                              | Site          | 0.180   | 3.33           | 0.089          |                 |                |
|                              | Season × Site | 0.004   | 0.079          | 0.782          |                 |                |
| Silt/Clay (%)                | Season        | 0.019   | 0.007          | 0.935          |                 |                |
|                              | Site          | 37.681  | 13.322         | <b>0.003</b>   |                 |                |
|                              | Season × Site | 0.691   | 0.244          | 0.629          |                 |                |
| Sorting coefficient          | Season        | 0.002   | 0.014          | 0.908          |                 |                |
|                              | Site          | 0.012   | 0.082          | 0.779          |                 |                |
|                              | Season × Site | 0.000   | 0.001          | 0.975          |                 |                |

Statistically significant findings ( $p < 0.05$ ) are highlighted in bold font.

Table S2 The results of Student's *t test*, Welch's *t test* and Mann–Whitney U test of the effects of season (wet vs. dry) and site (Dakwan vs. Nanwan) on flow velocity and salinity measured in southern Taiwan.

| Variable                  | Group      |     | n  | Mean<br>(Median) | <i>p</i> value             |                          |                            |
|---------------------------|------------|-----|----|------------------|----------------------------|--------------------------|----------------------------|
|                           | I          | II  |    |                  | Student's<br><i>t test</i> | Welch's<br><i>t test</i> | Mann–<br>Whitney<br>U test |
| Salinity                  | Wet        |     | 6  | 33.1             | <b>&lt;0.001</b>           | -                        | -                          |
|                           | Dry        |     | 10 | 34.7             |                            |                          |                            |
|                           | Dakwan (D) |     | 8  | 34.6             | -                          | -                        | 0.645                      |
|                           | Nanwan (N) |     | 8  | 34.4             |                            |                          |                            |
|                           | Dakwan     | Wet | 3  | 33.2             | <b>&lt;0.001</b>           | -                        | -                          |
|                           |            | Dry | 5  | 34.8             |                            |                          |                            |
|                           | Nanwan     | Wet | 3  | 33.0             | <b>0.005</b>               | -                        | -                          |
|                           |            | Dry | 5  | 34.6             |                            |                          |                            |
|                           | Wet        | D   | 3  | 33.2             | 0.684                      | -                        | -                          |
|                           |            | N   | 3  | 33.0             |                            |                          |                            |
|                           | Dry        | D   | 5  | 34.8             | 0.297                      | -                        | -                          |
|                           |            | N   | 5  | 34.6             |                            |                          |                            |
|                           | Wet        |     | 23 | 43.3             | -                          | 0.513                    | -                          |
|                           | Dry        |     | 24 | 42.0             |                            |                          |                            |
| Flow velocity<br>(loss %) | Dakwan     |     | 23 | 47.0             | -                          | -                        | <b>&lt;0.001</b>           |
|                           | Nanwan     |     | 24 | 40.0             |                            |                          |                            |
|                           | Dakwan     | Wet | 11 | 43.7             | <b>&lt;0.001</b>           | -                        | -                          |
|                           |            | Dry | 12 | 49.8             |                            |                          |                            |
|                           | Nanwan     | Wet | 12 | 41.5             | -                          | -                        | 0.102                      |
|                           |            | Dry | 12 | 37.0             |                            |                          |                            |
|                           | Wet        | D   | 11 | 43.7             | -                          | 0.128                    | -                          |
|                           |            | N   | 12 | 40.3             |                            |                          |                            |
|                           | Dry        | D   | 12 | 49.0             | -                          | -                        | <b>&lt;0.001</b>           |
|                           |            | N   | 12 | 37.0             |                            |                          |                            |

Statistically significant findings ( $p < 0.05$ ) are highlighted in bold font.

Table S3 Three-way ANOVA results of season (dry vs. wet), site (Dakwan vs. Nanwan) and species (*Thalassia hemprichii* vs. *Halodule uninervis*) on seagrass variables measured in southern Taiwan.

| Variable            | Factor                  | MS     | <i>F</i> value | <i>p</i> value   | Holm–Sidak test                                                      | Transformation |
|---------------------|-------------------------|--------|----------------|------------------|----------------------------------------------------------------------|----------------|
| Aboveground biomass | Season                  | 0.004  | 0.294          | 0.592            |                                                                      |                |
|                     | Site                    | 0.168  | 11.015         | <b>0.003</b>     | Nanwan > Dakwan                                                      |                |
|                     | Species                 | 1.016  | 66.727         | <b>&lt;0.001</b> | <i>T. hemprichii</i> > <i>H. uninervis</i>                           |                |
|                     | Season × Site           | 0.000  | 0.001          | 0.975            |                                                                      |                |
|                     | Season × Species        | 0.019  | 1.228          | 0.277            |                                                                      |                |
|                     | Site × Species          | 0.007  | 0.437          | 0.514            |                                                                      |                |
|                     | Season × Site × Species | 0.007  | 0.486          | 0.491            |                                                                      |                |
|                     |                         |        |                |                  |                                                                      |                |
| Belowground biomass | Season                  | 4.501  | 9.055          | <b>0.005</b>     |                                                                      |                |
|                     | Site                    | 4.396  | 8.845          | <b>0.006</b>     |                                                                      |                |
|                     | Species                 | 17.502 | 35.213         | <b>&lt;0.001</b> |                                                                      |                |
|                     | Season × Site           | 0.842  | 1.695          | 0.204            |                                                                      |                |
|                     | Season × Species        | 2.791  | 5.615          | <b>0.025</b>     | <i>T. hemprichii</i> : Wet > Dry<br><i>H. uninervis</i> : No pattern |                |
|                     | Site × Species          | 0.189  | 0.379          | 0.543            |                                                                      |                |
|                     | Season × Site × Species | 0.303  | 0.609          | 0.442            |                                                                      |                |
|                     |                         |        |                |                  |                                                                      |                |
| bg/ag ratio         | Season                  | 21.535 | 8.54           | <b>0.007</b>     | Wet > Dry                                                            |                |
|                     | Site                    | 0.099  | 0.039          | 0.845            |                                                                      |                |
|                     | Species                 | 0.033  | 0.013          | 0.910            |                                                                      |                |
|                     | Season × Site           | 0.635  | 0.252          | 0.620            |                                                                      |                |
|                     | Season × Species        | 1.602  | 0.635          | 0.432            |                                                                      |                |
|                     | Site × Species          | 0.369  | 0.146          | 0.705            |                                                                      |                |
|                     | Season × Site × Species | 0.300  | 0.119          | 0.733            |                                                                      |                |
|                     |                         |        |                |                  |                                                                      |                |
| Shoot density       | Season                  | 2.539  | 2.394          | 0.133            |                                                                      |                |
|                     | Site                    | 0.249  | 0.235          | 0.632            |                                                                      | Square root    |
|                     | Species                 | 71.068 | 67.011         | <b>&lt;0.001</b> | <i>H. uninervis</i> > <i>T. hemprichii</i>                           |                |

|                                                      |                         |        |        |              |                                            |
|------------------------------------------------------|-------------------------|--------|--------|--------------|--------------------------------------------|
| Canopy height                                        | Season × Site           | 0.345  | 0.325  | 0.573        |                                            |
|                                                      | Season × Species        | 0.009  | 0.009  | 0.926        |                                            |
|                                                      | Site × Species          | 0.183  | 0.172  | 0.681        |                                            |
|                                                      | Season × Site × Species | 0.001  | 0.001  | 0.981        |                                            |
|                                                      | Season                  | 4.481  | 1.777  | 0.193        | Nanwan > Dakwan                            |
|                                                      | Site                    | 22.190 | 8.798  | <b>0.006</b> |                                            |
|                                                      | Species                 | 8.450  | 3.350  | 0.078        |                                            |
|                                                      | Season × Site           | 0.470  | 0.186  | 0.669        |                                            |
|                                                      | Season × Species        | 0.939  | 0.372  | 0.547        | Dakwan > Nanwan                            |
|                                                      | Site × Species          | 0.174  | 0.069  | 0.795        |                                            |
|                                                      | Season × Site × Species | 0.108  | 0.042  | 0.838        |                                            |
|                                                      | Season                  | 0.001  | 0.0399 | 0.843        |                                            |
|                                                      | Site                    | 0.150  | 6.487  | <b>0.017</b> |                                            |
|                                                      |                         |        |        |              |                                            |
| Efficiency of space occupation (d <sub>grass</sub> ) | Species                 | 0.293  | 12.500 | <b>0.001</b> | <i>H. uninervis</i> > <i>T. hemprichii</i> |
|                                                      | Season × Site           | 0.000  | 0.017  | 0.896        |                                            |
|                                                      | Season × Species        | 0.062  | 2.646  | 0.115        |                                            |
|                                                      | Site × Species          | 0.004  | 0.175  | 0.679        |                                            |
|                                                      | Season × Site × Species | 0.012  | 0.506  | 0.483        |                                            |
|                                                      | Season                  | 0.005  | 0.683  | 0.416        |                                            |
|                                                      | Site                    | 0.008  | 0.949  | 0.338        |                                            |
|                                                      |                         |        |        |              |                                            |
| Periphyton biomass (g 100 cm <sup>-2</sup> )         | Species                 | 0.029  | 3.606  | 0.068        | Square root                                |
|                                                      | Season × Site           | 0.008  | 1.005  | 0.325        |                                            |
|                                                      | Season × Species        | 0.003  | 0.426  | 0.519        |                                            |
|                                                      | Site × Species          | 0.006  | 0.724  | 0.402        |                                            |
|                                                      | Season × Site × Species | 0.000  | 0.027  | 0.872        |                                            |
|                                                      | Season                  | 0.001  | 0.189  | 0.667        |                                            |
|                                                      | Site                    | 0.002  | 0.311  | 0.581        |                                            |
|                                                      |                         |        |        |              |                                            |
| Relative periphyton biomass (g g <sup>-1</sup> )     | Species                 | 0.003  | 0.408  | 0.528        |                                            |
|                                                      | Season × Site           | 0.010  | 1.141  | 0.245        |                                            |
|                                                      | Season × Species        | 0.001  | 0.197  | 0.661        |                                            |
|                                                      | Site × Species          | 0.007  | 0.964  | 0.335        |                                            |

|                                                                   |                         |        |       |              |                                               |             |
|-------------------------------------------------------------------|-------------------------|--------|-------|--------------|-----------------------------------------------|-------------|
| Leaf productivity<br>(mg 100 cm <sup>-2</sup> day <sup>-1</sup> ) | Season × Site × Species | 0.001  | 0.152 | 0.699        | <i>T. hemprichii</i> ><br><i>H. uninervis</i> | Square root |
|                                                                   | Season                  | 4.655  | 2.903 | 0.099        |                                               |             |
|                                                                   | Site                    | 0.711  | 0.444 | 0.511        |                                               |             |
|                                                                   | Species                 | 6.903  | 4.306 | <b>0.047</b> |                                               |             |
|                                                                   | Season × Site           | 1.768  | 1.103 | 0.303        |                                               |             |
|                                                                   | Season × Species        | 4.511  | 2.814 | 0.105        |                                               |             |
|                                                                   | Site × Species          | 2.234  | 1.394 | 0.248        |                                               |             |
|                                                                   | Season × Site × Species | 0.003  | 0.002 | 0.969        |                                               |             |
|                                                                   | Season                  | 20.271 | 4.187 | <b>0.05</b>  |                                               |             |
|                                                                   | Site                    | 4.054  | 0.837 | 0.368        |                                               |             |
| Specific growth rate<br>(mg g <sup>-1</sup> day <sup>-1</sup> )   | Species                 | 33.751 | 6.972 | <b>0.013</b> | <i>H. uninervis</i> ><br><i>T. hemprichii</i> | Square root |
|                                                                   | Season × Site           | 4.458  | 0.921 | 0.345        |                                               |             |
|                                                                   | Season × Species        | 1.073  | 0.222 | 0.641        |                                               |             |
|                                                                   | Site × Species          | 3.410  | 0.704 | 0.408        |                                               |             |
|                                                                   | Season × Site × Species | 2.538  | 0.524 | 0.475        |                                               |             |

---

Statistically significant findings ( $p < 0.05$ ) are highlighted in bold font.
